# Supplementary material
Source: PubMed Central journal article supplement (PMC3165168)
Supplement: NIHMS217818-supplement-01.pdf [file NIHMS217818-supplement-01.pdf]

## Supplementary Figure 1

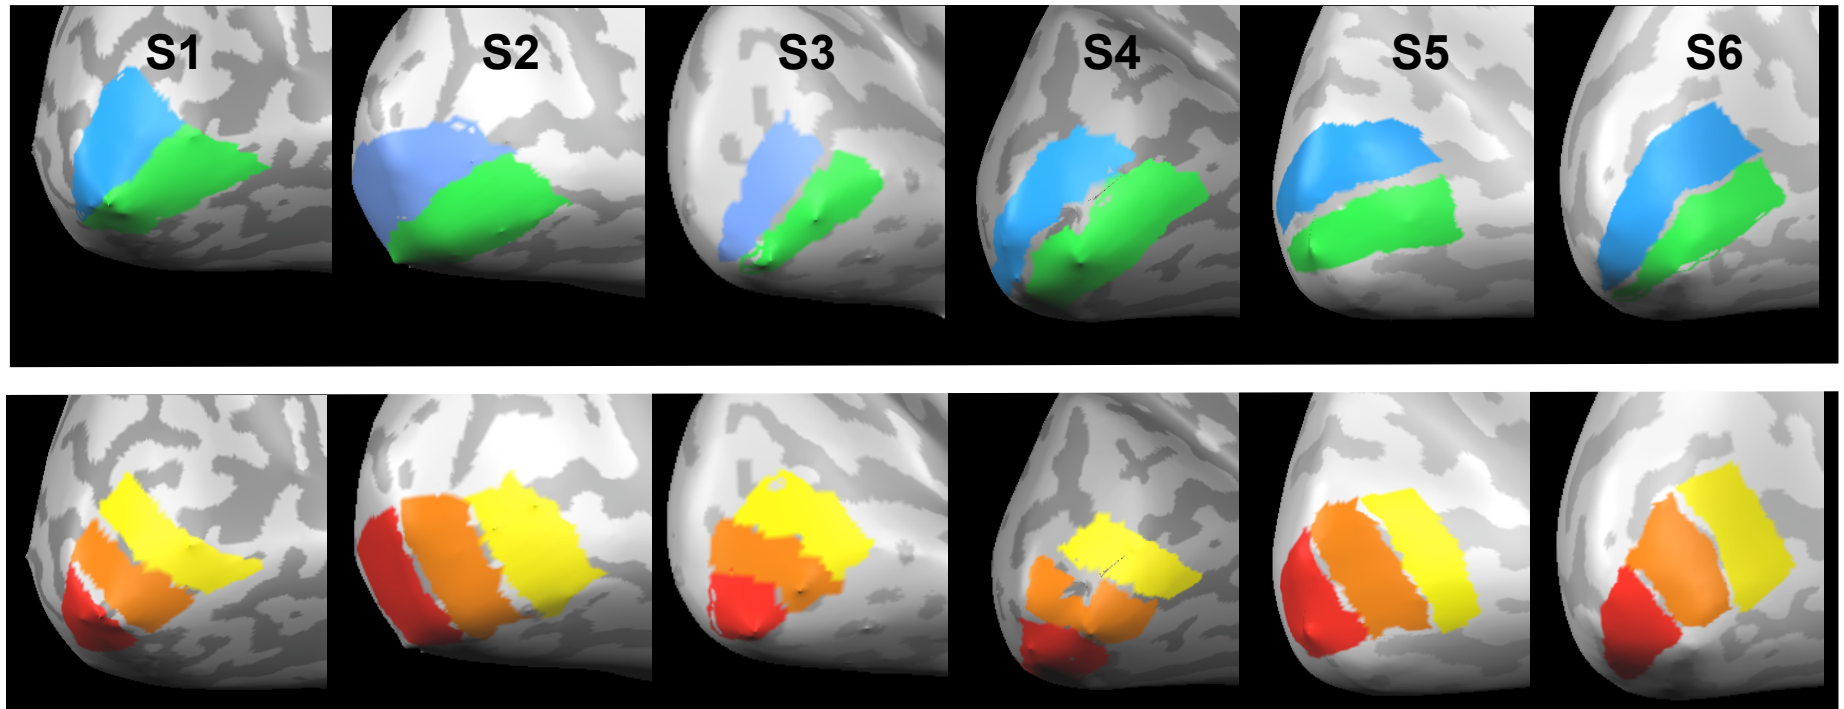

Supplementary Figure 1. Subregion selection in the left hemisphere of all subjects: V1 ventral (green) and dorsal (blue) subregions in the top row, and V1 central (red), middle (orange), and peripheral (yellow) subregions in the bottom row.

## Supplementary Figure 2

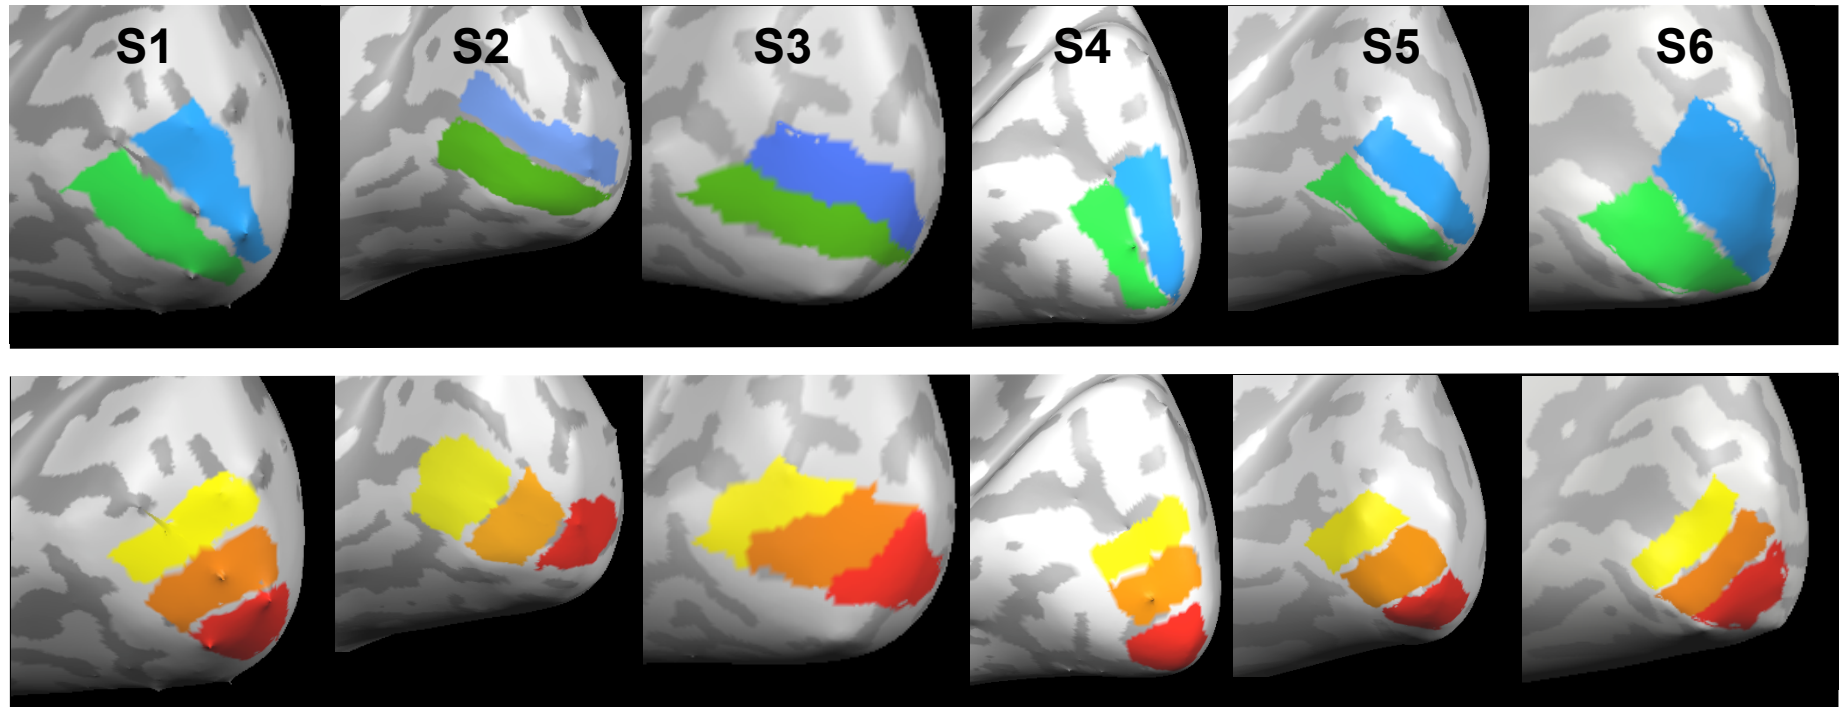

Supplementary Figure 1. Subregion selection in the right hemisphere of all subjects: V1 ventral (green) and dorsal (blue) subregions in the top row, and V1 central (red), middle (orange), and peripheral (yellow) subregions in the bottom row.

## Supplementary Figure 3

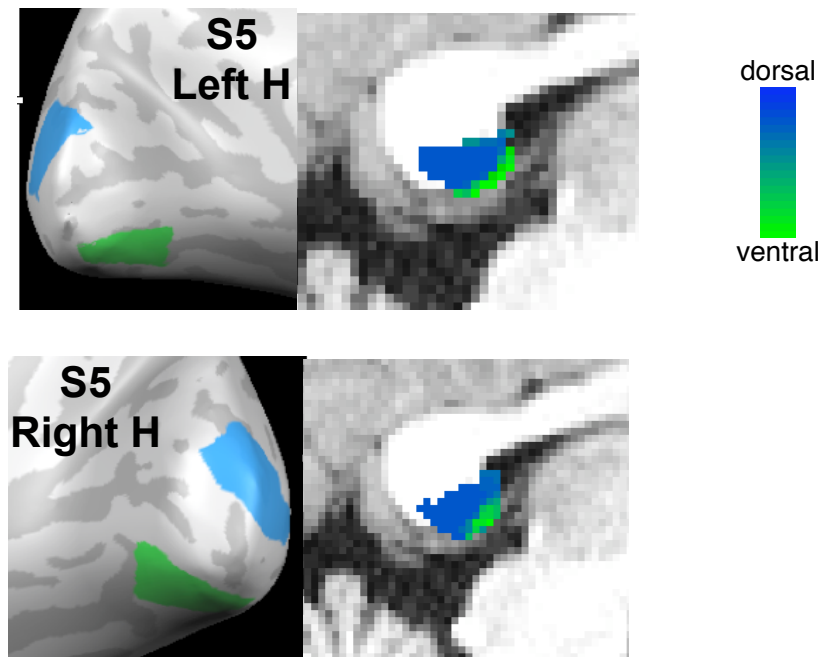

Supplementary Figure 3. Dorsal V2/V3 and Ventral V2/V3 subregion masks were defined by retinotopic mapping in S5. Splenium voxels were classified based upon the proportion of streamline connections reaching V2/V3 ventral (green) vs. dorsal (blue) subregions in each hemisphere.
